# Supplementary material for: The Role of a Food Literacy Intervention in Promoting Food Security and Food Literacy—OzHarvest’s NEST Program
Source: MDPI journal article supplement (doi:10.3390/nu12082197), 2020-07-23
Supplement: s1 [file s1]

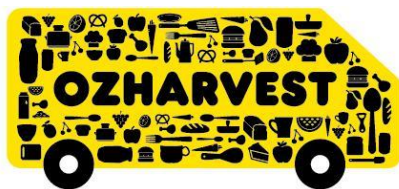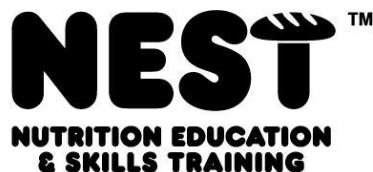

## PRE-POST PARTICIPANT SURVEY

By completing this survey you will help us to measure the impact of the program, so that we can continue to improve it. We hope you enjoy the NEST program!

### UNIQUE ID

To make sure that this survey remains anonymous, we won't be asking for any names or contact details. But we have 4 questions for you to answer, so we can give your survey its own unique ID.

1. What is the first letter of the city/town of this NEST program? (e.g. Melbourne = M) \* *Mark only one.*

☐

(M)

Melbourne

☐

(N) Newcastle

☐

(B) Brisbane

☐

(S) Sydney

☐

(G) Gold Coast

☐

(A) Adelaide

☐

(C) Canberra

2. What number represents the month you were born? (e.g. January = 01) \* *Mark only one.*

☐

01

☐

04

☐

07

☐

10

☐

02

☐

05

☐

08

☐

11

☐

03

☐

06

☐

09

☐

12

3. What is the first letter of your mother's first name? (e.g. Susan = S, if unknown use X) \* *Mark only one.*

A

☐

E

☐

I

☐

M

☐

Q

☐

U

☐

Y

☐

B

☐

F

☐

J

☐

N

☐

R

☐

V

☐

Z

☐

C

☐

G

☐

K

☐

O

☐

S

☐

W

☐

D

☐

H

☐

L

☐

P

☐

T

☐

X

☐

4. What is the first letter of your middle name? (e.g. Ann = A, if you don't have a middle name use X) \*Mark only one.

|   |                          |   |                          |   |                          |   |                          |   |                          |   |                          |   |                          |
|---|--------------------------|---|--------------------------|---|--------------------------|---|--------------------------|---|--------------------------|---|--------------------------|---|--------------------------|
| A | <input type="checkbox"/> | E | <input type="checkbox"/> | I | <input type="checkbox"/> | M | <input type="checkbox"/> | Q | <input type="checkbox"/> | U | <input type="checkbox"/> | Y | <input type="checkbox"/> |
| B | <input type="checkbox"/> | F | <input type="checkbox"/> | J | <input type="checkbox"/> | N | <input type="checkbox"/> | R | <input type="checkbox"/> | V | <input type="checkbox"/> | Z | <input type="checkbox"/> |
| C | <input type="checkbox"/> | G | <input type="checkbox"/> | K | <input type="checkbox"/> | O | <input type="checkbox"/> | S | <input type="checkbox"/> | W | <input type="checkbox"/> |   |                          |
| D | <input type="checkbox"/> | H | <input type="checkbox"/> | L | <input type="checkbox"/> | P | <input type="checkbox"/> | T | <input type="checkbox"/> | X | <input type="checkbox"/> |   |                          |

## PRE OR POST SURVEY

5. Is this your first or last NEST session? \* Mark only one oval.

- ☐ First session - Pre-program Survey [Skip to question 6.](#)
- ☐ Last session - Post-program Survey [Skip to question 16.](#)

## DEMOGRAPHIC INFORMATION

6. What is your age? \* Mark only one.

|             |             |             |           |
|-------------|-------------|-------------|-----------|
| 18-34 years | 35-54 years | 55-74 years | 75+ years |
|-------------|-------------|-------------|-----------|

7. What is your gender? \* Mark only one.

|      |        |                   |             |
|------|--------|-------------------|-------------|
| Male | Female | Prefer not to say | Other _____ |
|------|--------|-------------------|-------------|

8. Are you of Aboriginal or Torres Strait Islander Origin? \* Mark only one.

|    |                 |                             |
|----|-----------------|-----------------------------|
| No | Yes, Aboriginal | Yes, Torres Strait Islander |
|----|-----------------|-----------------------------|

9. What is the postcode of your usual residence/household? \*

|                      |                      |                      |                      |
|----------------------|----------------------|----------------------|----------------------|
| <input type="text"/> | <input type="text"/> | <input type="text"/> | <input type="text"/> |
|----------------------|----------------------|----------------------|----------------------|

10. Including yourself how many people live in your usual residence/household? \* Mark only one.

|   |   |   |   |   |    |
|---|---|---|---|---|----|
| 1 | 2 | 3 | 4 | 5 | 6+ |
|---|---|---|---|---|----|

**11. Which best describes your current employment status? \* Mark only one oval.**

- ☐ Full-time employee
- ☐ Part-time employee
- ☐ Self-employed
- ☐ Employed - unpaid worker (e.g. volunteer or family business)
- ☐ Unemployed - seeking full time or part-time work
- ☐ Not employed - not seeking employment  
(e.g. pension, disability support pension)

**12. Which best describes your current food preparation situation? \* Mark only one oval.**

- ☐ I prepare/cook ALL food/meals for myself and/or others
- ☐ I prepare/cook MOST food/meals for myself and/or others
- ☐ I prepare/cook SOME food/meals for myself and/or others
- ☐ I prepare/cook NO food/meals for myself and/or others

**13. What is the highest level of education that you have completed? \* Mark only one.**

- |                                                |                                                                          |
|------------------------------------------------|--------------------------------------------------------------------------|
| <input type="checkbox"/> Never attended school | <input type="checkbox"/> Tafe Certificate 1,2,3,4                        |
| <input type="checkbox"/> Year 8 or below       | <input type="checkbox"/> Advanced Diploma or Diploma Level               |
| <input type="checkbox"/> Year 9 or equivalent  | <input type="checkbox"/> Bachelor's degree Level                         |
| <input type="checkbox"/> Year 10 or equivalent | <input type="checkbox"/> Graduate Diploma and Graduate Certificate Level |
| <input type="checkbox"/> Year 11 or equivalent | <input type="checkbox"/> Postgraduate Degree Level                       |
| <input type="checkbox"/> Year 12 or equivalent | <input type="checkbox"/> Other                                           |

**14. Which best describes your current household structure?**

\* Mark only one oval.

- ☐ Couple family with dependent children
- ☐ One parent family with dependent children
- ☐ Couple only
- ☐ Multiple family household
- ☐ Lone person
- ☐ Group household (e.g. community housing, rehabilitation housing etc)
- ☐ Other

**15. Which best describes your current living situation?***\* Mark only one oval.*

- ☐ Living in a house/apartment/flat that I (own/rent/social public housing)
- ☐ Living in an assisted living facility/residential care/temporary accommodation/caravan
- ☐ Living in a short-term emergency accommodation/crisis shelter/transitional housing
- ☐ Living in varied places including couch surfing/tents/sleeping rough
- ☐ Other: \_\_\_\_\_

**Skip to question 27.****OVERALL SATISFACTION WITH NEST PROGRAM****16. Tick the session(s) which you have attended** *\* Tick all that apply.*

- ☐ Module 1: Eat for Variety
- ☐ Module 2: Eat for Wellbeing
- ☐ Module 3: Eat for Balance
- ☐ Module 4: Eat for the Environment
- ☐ Module 5: Eat for Choice
- ☐ Module 6: Eat for Life

**17. On a scale of 1-5, how would you rate your overall experience of the NEST program? \****Mark only one.*

Not good

|   |   |   |   |   |
|---|---|---|---|---|
| 1 | 2 | 3 | 4 | 5 |
|---|---|---|---|---|

Very good

**18. What did you like most about the NEST program? \*Mark only one oval..**

- ☐ Education
- ☐ Cooking
- ☐ Games and activities
- ☐ Cookbooks, handouts, resources
- ☐ I liked everything about the program
- ☐ I did not like anything about the program
- ☐ Other: \_\_\_\_\_

19. What did you like least about the NEST program? \* *Mark only one oval.*

- ☐ Education
- ☐ Cooking
- ☐ Games and activities
- ☐ Cookbooks, handouts, resources
- ☐ I liked everything about the program
- ☐ I did not like anything about the program

20. On a scale of 1-5, how likely would you recommend the program to a friend or family member? \*  
*Mark only one.*

Not likely

|   |   |   |   |   |
|---|---|---|---|---|
| 1 | 2 | 3 | 4 | 5 |
|---|---|---|---|---|

Very likely

21. Repeating this survey in 6 months time can provide valuable insights into sustained changes in food knowledge, attitudes, beliefs, skills, and behaviours. This can help us to improve future programs. Do you consent to being contacted in the future for a 6-month follow up? \* *Mark only one oval.*

- ☐ Yes **Skip to question 22.**
- ☐ No **Skip to question 27.**

## CONTACT DETAILS:

You have ticked 'yes' to be followed up in 6 months, please print your full name to indicate your consent, the date of consent, and please provide us with your contact details.

22. Full name \* \_\_\_\_\_

23. Agency name \* \_\_\_\_\_

24. Date of consent \* \_\_\_\_\_

25. Email address \* \_\_\_\_\_

26. Contact Phone Number \* \_\_\_\_\_

**Skip to question 27.**

## FOOD LITERACY

27. How many servings of fruit should you eat every day for good health? \*Mark only one.

|   |   |   |   |   |   |
|---|---|---|---|---|---|
| 1 | 2 | 3 | 4 | 5 | 6 |
|---|---|---|---|---|---|

Serves per day

28. How many servings of vegetables should you eat every day for good health? \*Mark only one.

|   |   |   |   |   |   |
|---|---|---|---|---|---|
| 1 | 2 | 3 | 4 | 5 | 6 |
|---|---|---|---|---|---|

Serves per day

## NUTRITION PANEL

Please use the Nutrition Information Panel to answer the following questions:

29. What is the main ingredient in the product? \* Mark only one.

|                                  |                                   |
|----------------------------------|-----------------------------------|
| <input type="checkbox"/> Sugar   | <input type="checkbox"/> Honey    |
| <input type="checkbox"/> Rice    | <input type="checkbox"/> Salt     |
| <input type="checkbox"/> Cereals | <input type="checkbox"/> Not sure |

30. In this product is there more sugar or rice? \*

Mark only one.

|            |           |            |
|------------|-----------|------------|
| More sugar | More rice | Don't know |
|------------|-----------|------------|

31. In 100 grams of this product, how many grams of sugar are there? \* Mark only one.

|                                     |                                    |
|-------------------------------------|------------------------------------|
| <input type="checkbox"/> 11.8 grams | <input type="checkbox"/> 1.2 grams |
| <input type="checkbox"/> 21.2 grams | <input type="checkbox"/> 1.3 grams |

| Nutrition Information                                                                                                              |              |               |
|------------------------------------------------------------------------------------------------------------------------------------|--------------|---------------|
| Servings per package – 16                                                                                                          |              |               |
| Serving size – 30g (2/3 cup)                                                                                                       |              |               |
|                                                                                                                                    | Per serve    | Per 100g      |
| <b>Energy</b>                                                                                                                      | <b>432kJ</b> | <b>1441kJ</b> |
| <b>Protein</b>                                                                                                                     | 2.8g         | 9.3g          |
| <b>Fat</b>                                                                                                                         |              |               |
| Total                                                                                                                              | 0.4g         | 1.2g          |
| Saturated                                                                                                                          | 0.1g         | 0.3g          |
| <b>Carbohydrate</b>                                                                                                                |              |               |
| Total                                                                                                                              | 18.9g        | 62.9g         |
| Sugars                                                                                                                             | 3.5g         | 11.8g         |
| <b>Fibre</b>                                                                                                                       | 6.4g         | 21.2g         |
| <b>Sodium</b>                                                                                                                      | 65mg         | 215mg         |
| <b>Ingredients:</b> Cereals (76%) (wheat, oatbran, barley), psyllium husk (11%), sugar, rice, malt extract, honey, salt, vitamins. |              |               |

Figure 1: Eat for Health - Eating well food label

## CONFIDENCE AND SELF-EFFICACY

32. On a scale of 1-5, how confident are you that you can eat the recommended number of servings of fruit each day? \* *Mark only one number.*

Not at all confident 

|   |   |   |   |   |
|---|---|---|---|---|
| 1 | 2 | 3 | 4 | 5 |
|---|---|---|---|---|

 Extremely confident

33. On a scale of 1-5, how confident are you that you can eat the recommended number of servings of vegetables each day? \* *Mark only one number.*

Not at all confident 

|   |   |   |   |   |
|---|---|---|---|---|
| 1 | 2 | 3 | 4 | 5 |
|---|---|---|---|---|

 Extremely confident

34. On a scale of 1-5, how confident are you that you can buy healthy foods on a budget? \* *Mark only one number.*

Not at all confident 

|   |   |   |   |   |
|---|---|---|---|---|
| 1 | 2 | 3 | 4 | 5 |
|---|---|---|---|---|

 Extremely confident

35. On a scale of 1-5, how confident do you feel to follow a simple recipe? \* *Mark only one number.*

Not at all confident 

|   |   |   |   |   |
|---|---|---|---|---|
| 1 | 2 | 3 | 4 | 5 |
|---|---|---|---|---|

 Extremely confident

36. On a scale of 1-5, how confident do you feel about following a simple recipe? \* *Mark only one number.*

Not at all confident 

|   |   |   |   |   |
|---|---|---|---|---|
| 1 | 2 | 3 | 4 | 5 |
|---|---|---|---|---|

 Extremely confident

37. On a scale of 1-5, how confident do you feel about tasting foods that you have not eaten before? \* *Mark only one number.*

Not at all confident 

|   |   |   |   |   |
|---|---|---|---|---|
| 1 | 2 | 3 | 4 | 5 |
|---|---|---|---|---|

 Extremely confident

38. On a scale of 1-5, how confident do you feel about preparing and cooking new foods and recipes? \* *Mark only one number.*

Not at all confident 

|   |   |   |   |   |
|---|---|---|---|---|
| 1 | 2 | 3 | 4 | 5 |
|---|---|---|---|---|

 Extremely confident

## FOOD BEHAVIOURS

39. How often do you look for low-salt varieties of foods? \* *Mark only one.*

|        |       |           |       |
|--------|-------|-----------|-------|
| Always | Often | Sometimes | Never |
|--------|-------|-----------|-------|

40. How often do you choose wholemeal/wholegrain bread? \* *Mark only one.*

|        |       |           |       |
|--------|-------|-----------|-------|
| Always | Often | Sometimes | Never |
|--------|-------|-----------|-------|

41. How often do you read the Nutrition Information Panel on food items when you go shopping? \* *Mark only one.*

|        |       |           |       |
|--------|-------|-----------|-------|
| Always | Often | Sometimes | Never |
|--------|-------|-----------|-------|

42. How often do you read the ingredients list on food items when you go shopping? \* *Mark only one.*

|        |       |           |       |
|--------|-------|-----------|-------|
| Always | Often | Sometimes | Never |
|--------|-------|-----------|-------|

43. How often do you look at the price per kilo when shopping? \* *Mark only one.*

|        |       |           |       |
|--------|-------|-----------|-------|
| Always | Often | Sometimes | Never |
|--------|-------|-----------|-------|

44. How often do you change recipes to make them healthier? \* *Mark only one.*

|        |       |           |       |
|--------|-------|-----------|-------|
| Always | Often | Sometimes | Never |
|--------|-------|-----------|-------|

45. How often do you add salt to food during cooking? \* *Mark only one.*

|        |       |           |       |
|--------|-------|-----------|-------|
| Always | Often | Sometimes | Never |
|--------|-------|-----------|-------|

46. How often do you use a shopping list? \* *Mark only one.*

|        |       |           |       |
|--------|-------|-----------|-------|
| Always | Often | Sometimes | Never |
|--------|-------|-----------|-------|

## VEGETABLES & FRUIT

47. About how many serves of VEGETABLES do you usually eat per day? *Do not include hot chips or fried potato.* \* *Mark only one oval.*

- ☐ I don't eat vegetables  
☐ Less than 1 serve per day  
☐ 1 serve per day  
☐ 2 serves per day  
☐ 3 serves per day  
☐ 4 serves per day  
☐ 5 serves per day  
☐ 6 or more serves per day

**What is a serve of vegetables\*?**  
A standard serve is about 75g (100–350kJ) or:

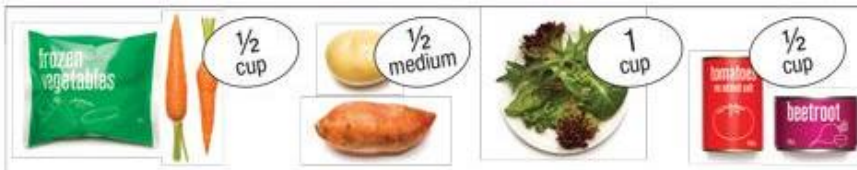

\*With canned varieties, choose those with no added salt

48. About how many serves of FRUIT do you usually eat per day? *Do not include fruit juice or fruit drink.* \* *Mark only one oval.*

- ☐ 1 don't eat fruit  
☐ Less than 1 serve per day  
☐ 1 serve per day  
☐ 2 serves per day  
☐ 3 serves per day  
☐ 4 serves per day  
☐ 5 serves per day  
☐ 6 or more serves per day

**What is a serve of fruit?**  
A standard serve is about 150g (350kJ) or:





## KEY DISCRETIONARY FOODS

**49. In the past 6 weeks how often have you eaten potato crisps or salty snack foods?** \* *Mark only one.*

|                               |                 |           |                |                |          |               |               |                     |
|-------------------------------|-----------------|-----------|----------------|----------------|----------|---------------|---------------|---------------------|
| Never or less than once/month | 1-3 times/month | Once/week | 2-4 times/week | 5-6 times/week | Once/day | 2-3 times/day | 4-5 times/day | 6 or more times/day |
|-------------------------------|-----------------|-----------|----------------|----------------|----------|---------------|---------------|---------------------|

**50. In the past 6 weeks how often have you eaten chocolate or lollies?** \* *Mark only one.*

|                               |                 |           |                |                |          |               |               |                     |
|-------------------------------|-----------------|-----------|----------------|----------------|----------|---------------|---------------|---------------------|
| Never or less than once/month | 1-3 times/month | Once/week | 2-4 times/week | 5-6 times/week | Once/day | 2-3 times/day | 4-5 times/day | 6 or more times/day |
|-------------------------------|-----------------|-----------|----------------|----------------|----------|---------------|---------------|---------------------|

**51. In the past 6 weeks how often have you eaten cake, doughnuts, sweet biscuits?** \* *Mark only one.*

|                               |                 |           |                |                |          |               |               |                     |
|-------------------------------|-----------------|-----------|----------------|----------------|----------|---------------|---------------|---------------------|
| Never or less than once/month | 1-3 times/month | Once/week | 2-4 times/week | 5-6 times/week | Once/day | 2-3 times/day | 4-5 times/day | 6 or more times/day |
|-------------------------------|-----------------|-----------|----------------|----------------|----------|---------------|---------------|---------------------|

**52. In the past 6 weeks how often have you eaten pies, pasties, or sausage rolls?** \* *Mark only one.*

|                               |                 |           |                |                |          |               |               |                     |
|-------------------------------|-----------------|-----------|----------------|----------------|----------|---------------|---------------|---------------------|
| Never or less than once/month | 1-3 times/month | Once/week | 2-4 times/week | 5-6 times/week | Once/day | 2-3 times/day | 4-5 times/day | 6 or more times/day |
|-------------------------------|-----------------|-----------|----------------|----------------|----------|---------------|---------------|---------------------|

**53. In the past 6 weeks how often have you eaten fast foods (e.g. McDonalds, KFC)?** \* *Mark only one.*

|                               |                 |           |                |                |          |               |               |                     |
|-------------------------------|-----------------|-----------|----------------|----------------|----------|---------------|---------------|---------------------|
| Never or less than once/month | 1-3 times/month | Once/week | 2-4 times/week | 5-6 times/week | Once/day | 2-3 times/day | 4-5 times/day | 6 or more times/day |
|-------------------------------|-----------------|-----------|----------------|----------------|----------|---------------|---------------|---------------------|

**54. In the past 6 weeks how often have you eaten pizza (all kinds including takeaway and homemade)?**  
\* *Mark only one.*

|                               |                 |           |                |                |          |               |               |                     |
|-------------------------------|-----------------|-----------|----------------|----------------|----------|---------------|---------------|---------------------|
| Never or less than once/month | 1-3 times/month | Once/week | 2-4 times/week | 5-6 times/week | Once/day | 2-3 times/day | 4-5 times/day | 6 or more times/day |
|-------------------------------|-----------------|-----------|----------------|----------------|----------|---------------|---------------|---------------------|

## SUGAR-SWEETENED BEVERAGE CONSUMPTION

55. How many cups of soft drink, cordials, sports drinks or caffeinated energy drinks do you usually drink each day? \* *Mark only one oval.*

- ☐ I don't drink sugar-sweetened drinks
- ☐ I choose diet or no sugar drinks
- ☐ Less than 1 cup per day
- ☐ 1 cup per day
- ☐ 2 cups per day
- ☐ 3 cups per day
- ☐ 4-5 cups per day
- ☐ 6-7 cups per day
- ☐ 8-9 cups per day
- ☐ 10 or more cups per day

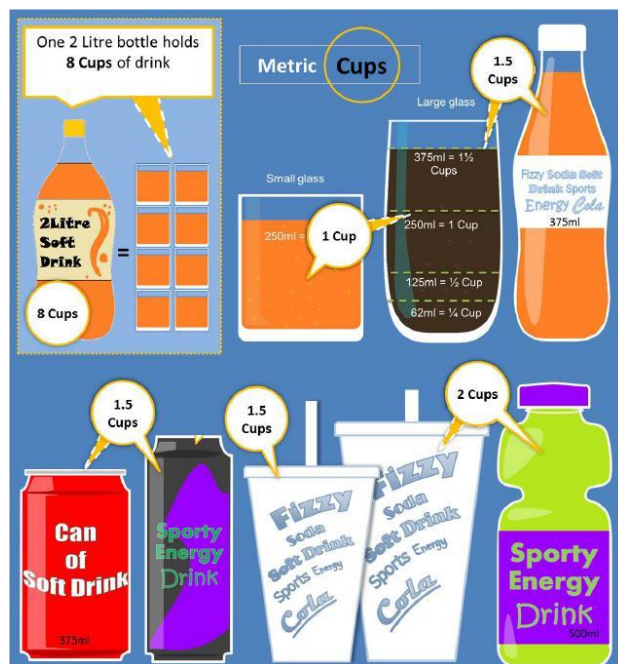

## WATER CONSUMPTION

*1/2 a cup of water = 1 serve*

*A 600ml bottle of water = 5 serves*

*A 1L bottle of water = 8 serves*

56. About how many serves of PLAIN WATER in total do you usually drink each day? \* *Mark only one oval.*

- ☐ I don't drink plain water
- ☐ Less than 1 serve per day
- ☐ 1 serve per day
- ☐ 2 serves per day
- ☐ 3 serves
- ☐ 4-5 serves
- ☐ 6-7 serves
- ☐ 8-9 serves
- ☐ 10 or more serves

## FOOD SECURITY

These next questions are about the food eaten in your household in the last 6 weeks and whether you were able to afford the food you need.

57. "The food that (I/we) bought just didn't last, and (I/we) didn't have money to get more."

In the last 6 weeks was this: *\*Mark only one.*

|            |                |            |            |
|------------|----------------|------------|------------|
| Often true | Sometimes true | Never true | Don't know |
|------------|----------------|------------|------------|

58. "(I/we) couldn't afford to eat balanced meals." In the last 6 weeks was this: *\* Mark only one.*

|            |                |            |            |
|------------|----------------|------------|------------|
| Often true | Sometimes true | Never true | Don't know |
|------------|----------------|------------|------------|

59. In the last 6 weeks, did you/or other adults in your household ever cut the size of your meals or skip meals because there wasn't enough money for food? *\* Mark only one.*

|                                 |                                |                                        |
|---------------------------------|--------------------------------|----------------------------------------|
| Yes <i>Skip to question 68.</i> | No <i>Skip to question 69.</i> | Don't know <i>Skip to question 69.</i> |
|---------------------------------|--------------------------------|----------------------------------------|

60. **How often did this happen?** *\*Mark only one.*

|                    |                                 |                    |            |                |
|--------------------|---------------------------------|--------------------|------------|----------------|
| Almost every month | Some months but not every month | Only 1 or 2 months | Don't know | Not applicable |
|--------------------|---------------------------------|--------------------|------------|----------------|

***Skip to question 69***

61. **In the last 6 weeks, did you ever eat less than you felt you should because there wasn't enough money for food?** *Mark only one.*

|     |    |            |
|-----|----|------------|
| Yes | No | Don't know |
|-----|----|------------|

62. In the last 6 weeks, were you ever hungry but didn't eat because there wasn't enough money for food? *Mark only one.*

|     |    |            |
|-----|----|------------|
| Yes | No | Don't know |
|-----|----|------------|

**THANK YOU FOR COMPLETING OUR SURVEY!**
